# Supplementary material for: Theoretical investigations on microwave Fano resonances in 3D-printable hollow dielectric resonators
Source: PubMed Central journal article supplement (PMC5701065; doi:10.1038/s41598-017-16501-3), 2017-11-23
Supplement: 41598_2017_16501_MOESM1_ESM.pdf [file 41598_2017_16501_MOESM1_ESM.pdf]

## Supplementary Information

# **Theoretical investigations on microwave Fano resonances in 3D-printable hollow dielectric resonators**

Eunsongyi Lee, In Cheol Seo, Hoon Yeub Jeong, Soo-Chan An, and Young Chul Jun  
School of Materials Science and Engineering, Ulsan National Institute of Science and Technology  
(UNIST), Ulsan 44919, Republic of Korea

**Supplementary Figure S1:** Extinction cross section spectra for a single spherical particle.

**Supplementary Figure S2:** Resonance characteristics of Fano resonances

**Supplementary Figure S3:** Transmission spectra of Fano resonances for three hollow dielectric pairs

**Supplementary Figure S4:** Fano resonance shifts due to the changes of environmental and material indices

**Supplementary Figure 1**

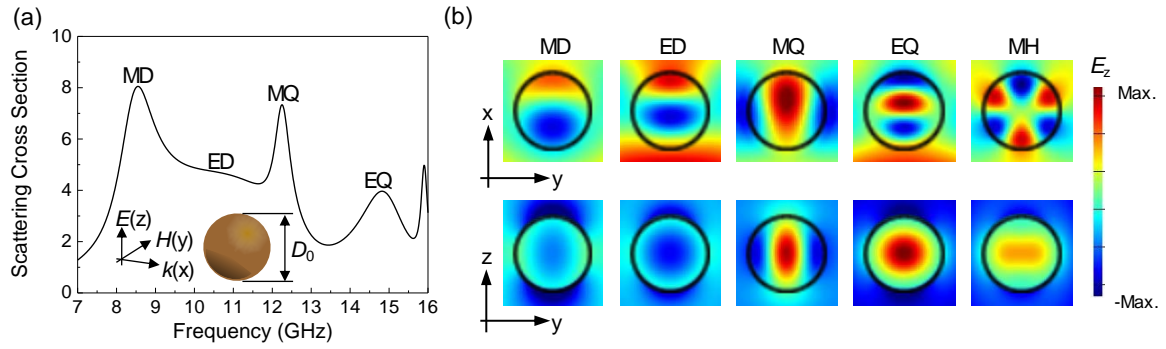

Fig. S1 Extinction cross section spectra for a single spherical particle. The inset shows the schematic of a sphere. Incident light is propagating along the x axis. The diameter of the particle is  $D_0$ . Each peak corresponds to a Mie resonance mode; MD (magnetic dipole), ED (electric dipole), MQ (magnetic quadrupole), EQ (electric quadrupole), and MH (magnetic hexapole). (b) The top (bottom) panels represent the  $E_z$  component of Mie resonance modes on the xy (yz) plane.

## Supplementary Figure 2

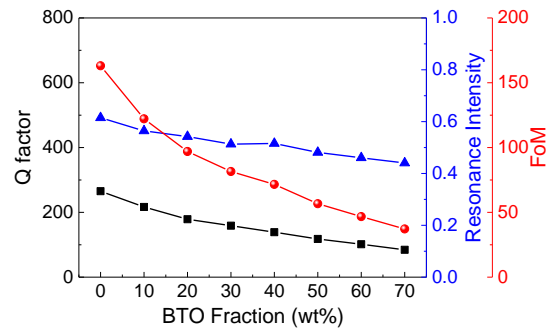

Fig. S2 Resonance characteristics as a function of BTO fraction [extracted from Fig. 4(c)]: Q factor, resonance intensity, and the figure of merit (FoM) for the cylinder pair array. As the BTO fraction increases, both Q factor and resonance intensity decreases. Therefore, the FoM drops fast with the increased BTO fraction.

**Supplementary Figure 3**

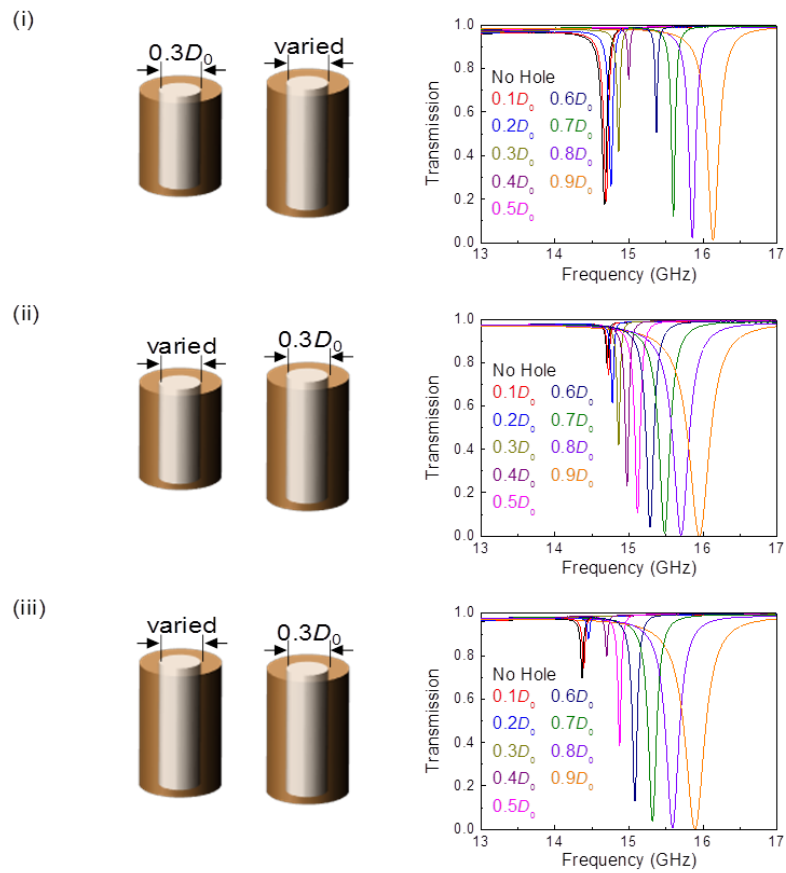

Fig. S3 (a)-(c) Transmission spectra for three different cases (corresponding to Fig. 6): (i) Asymmetric cylinder pair with the hole size of the shorter cylinder fixed as  $0.3D_0$  but the other varied, (ii) Asymmetric cylinder pair with the hole size of the longer cylinder fixed as  $0.3D_0$  but the other varied, (iii) Symmetric cylinder pair (i.e., having the same cylinder length) with the hole size of one cylinder fixed as  $0.3D_0$  but the other varied.

Supplementary Figure 4

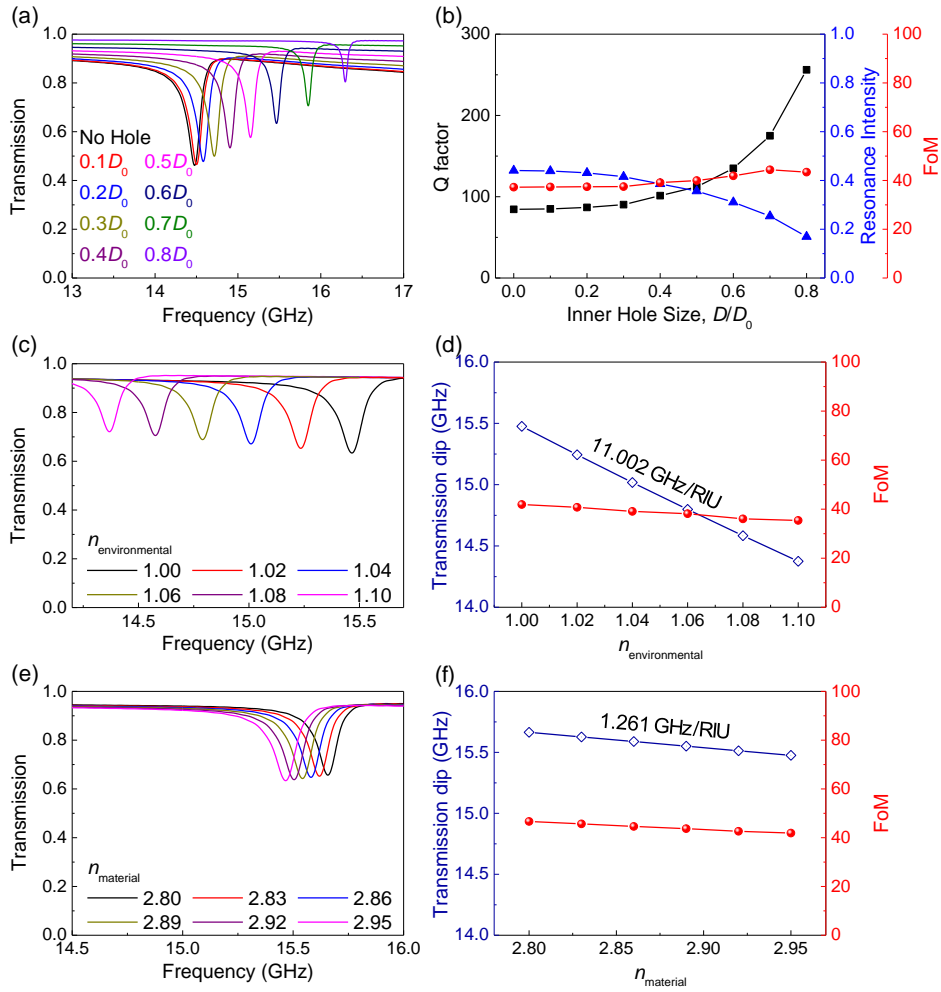

Fig. S4. **Fano resonances for 70 wt% BTO fraction:** (a) Transmission spectra for a hollow dielectric pair, (b) Resonance characteristics (Q factor, resonance intensity, and FoM). In (a) and (b), the resonator length is the same as that for Fig. 5 (0 wt% BTO). (c) Resonance shift for different environmental indices, (d) Sensitivity and FoM as a function of the environmental index, (e) Resonance shift for different material indices, (f) Sensitivity and FoM as a function of the material index. In (c)-(f), the resonator geometry is the same as that for Fig. 7 (0 wt% BTO). The inner hole diameter is  $0.6D_0$ .
